# Supplementary material
Source: publisher figshare collection journal article supplement (https://gsajournals.figshare.com/ndownloader/files/14303261)
Supplement: Supplementary file 1 [file 14303261]

## Sheet: D. simulans mtDNAs
Cage	Nuclear Genotype	mtDNA species-type	No. Mau12	No. SiI	No. SM21	Number of individuals successfully genotyped	Frequency Mau12	Frequency SiI	Frequency SM21	Generation_NEW	pre/post-perturbation
1	OreR	D. simulans	26	31	32	89	0.292135	0.348315	0.359551	0	pre
2	OreR	D. simulans	23	29	35	87	0.264368	0.333333	0.402299	0	pre
3	OreR	D. simulans	21	30	40	91	0.230769	0.32967	0.43956	0	pre
4	OreR	D. simulans	32	29	31	92	0.347826	0.315217	0.336957	0	pre
5	Aut	D. simulans	28	34	28	90	0.311111	0.377778	0.311111	0	pre
6	Aut	D. simulans	17	45	28	90	0.188889	0.5	0.311111	0	pre
7	Aut	D. simulans	21	28	40	89	0.235955	0.314607	0.449438	0	pre
8	Aut	D. simulans	26	32	34	92	0.282609	0.347826	0.369565	0	pre
1	OreR	D. simulans	42	35	13	90	0.466667	0.388889	0.144444	1	pre
2	OreR	D. simulans	15	38	13	66	0.227273	0.575758	0.19697	1	pre
3	OreR	D. simulans	17	39	29	85	0.2	0.458824	0.341176	1	pre
4	OreR	D. simulans	23	31	28	82	0.280488	0.378049	0.341463	1	pre
5	Aut	D. simulans	22	48	5	75	0.293333	0.64	0.0666667	1	pre
6	Aut	D. simulans	35	31	25	91	0.384615	0.340659	0.274725	1	pre
7	Aut	D. simulans	16	25	9	50	0.32	0.5	0.18	1	pre
8	Aut	D. simulans	24	27	29	80	0.3	0.3375	0.3625	1	pre
1	OreR	D. simulans	10	51	31	92	0.108696	0.554348	0.336957	3	pre
2	OreR	D. simulans	18	52	20	90	0.2	0.577778	0.222222	3	pre
3	OreR	D. simulans	12	44	31	87	0.137931	0.505747	0.356322	3	pre
4	OreR	D. simulans	15	38	38	91	0.164835	0.417582	0.417582	3	pre
5	Aut	D. simulans	23	29	35	87	0.264368	0.333333	0.402299	3	pre
6	Aut	D. simulans	29	22	33	84	0.345238	0.261905	0.392857	3	pre
7	Aut	D. simulans	26	26	36	88	0.295455	0.295455	0.409091	3	pre
8	Aut	D. simulans	37	29	26	92	0.402174	0.315217	0.282609	3	pre
1	OreR	D. simulans	9	47	23	79	0.113924	0.594937	0.291139	5	pre
2	OreR	D. simulans	14	56	20	90	0.155556	0.622222	0.222222	5	pre
3	OreR	D. simulans	11	27	25	63	0.174603	0.428571	0.396825	5	pre
4	OreR	D. simulans	21	39	13	73	0.287671	0.534247	0.178082	5	pre
5	Aut	D. simulans	47	37	6	90	0.522222	0.411111	0.0666667	5	pre
6	Aut	D. simulans	42	29	8	79	0.531646	0.367089	0.101266	5	pre
7	Aut	D. simulans	19	32	34	85	0.223529	0.376471	0.4	5	pre
8	Aut	D. simulans	24	37	30	91	0.263736	0.406593	0.32967	5	pre
1	OreR	D. simulans	8	57	27	92	0.0869565	0.619565	0.293478	7	pre
2	OreR	D. simulans	8	65	16	89	0.0898876	0.730337	0.179775	7	pre
3	OreR	D. simulans	16	47	29	92	0.173913	0.51087	0.315217	7	pre
4	OreR	D. simulans	6	64	19	89	0.0674157	0.719101	0.213483	7	pre
5	Aut	D. simulans	26	33	30	89	0.292135	0.370787	0.337079	7	pre
6	Aut	D. simulans	21	35	33	89	0.235955	0.393258	0.370787	7	pre
7	Aut	D. simulans	43	12	34	89	0.483146	0.134831	0.382022	7	pre
8	Aut	D. simulans	15	27	40	82	0.182927	0.329268	0.487805	7	pre
1	OreR	D. simulans	8	46	27	81	0.0987654	0.567901	0.333333	9	pre
2	OreR	D. simulans	6	76	9	91	0.0659341	0.835165	0.0989011	9	pre
3	OreR	D. simulans	15	47	26	88	0.170455	0.534091	0.295455	9	pre
4	OreR	D. simulans	21	49	20	90	0.233333	0.544444	0.222222	9	pre
5	Aut	D. simulans	30	29	30	89	0.337079	0.325843	0.337079	9	pre
6	Aut	D. simulans	34	23	20	77	0.441558	0.298701	0.25974	9	pre
7	Aut	D. simulans	28	22	33	83	0.337349	0.26506	0.39759	9	pre
8	Aut	D. simulans	19	36	30	85	0.223529	0.423529	0.352941	9	pre
1	OreR	D. simulans	9	44	37	90	0.1	0.488889	0.411111	10	post
2	OreR	D. simulans	17	24	22	63	0.269841	0.380952	0.349206	10	post
3	OreR	D. simulans	55	29	8	92	0.597826	0.315217	0.0869565	10	post
4	OreR	D. simulans	38	29	24	91	0.417582	0.318681	0.263736	10	post
5	Aut	D. simulans	37	30	23	90	0.411111	0.333333	0.255556	10	post
6	Aut	D. simulans	24	32	27	83	0.289157	0.385542	0.325301	10	post
7	Aut	D. simulans	24	36	18	78	0.307692	0.461538	0.230769	10	post
8	Aut	D. simulans	19	37	29	85	0.223529	0.435294	0.341176	10	post
1	OreR	D. simulans	16	43	32	91	0.175824	0.472527	0.351648	16	post
2	OreR	D. simulans	10	68	11	89	0.11236	0.764045	0.123596	16	post
3	OreR	D. simulans	28	19	43	90	0.311111	0.211111	0.477778	16	post
4	OreR	D. simulans	25	21	45	91	0.274725	0.230769	0.494505	16	post
5	Aut	D. simulans	48	12	31	91	0.527473	0.131868	0.340659	16	post
6	Aut	D. simulans	7	24	31	62	0.112903	0.387097	0.5	16	post
7	Aut	D. simulans	21	27	44	92	0.228261	0.293478	0.478261	16	post
8	Aut	D. simulans	39	15	30	84	0.464286	0.178571	0.357143	16	post
1	OreR	D. simulans	13	37	29	79	0.164557	0.468354	0.367089	23	post
2	OreR	D. simulans	1	74	9	84	0.0119048	0.880952	0.107143	23	post
3	OreR	D. simulans	15	26	47	88	0.170455	0.295455	0.534091	23	post
4	OreR	D. simulans	23	14	55	92	0.25	0.152174	0.597826	23	post
5	Aut	D. simulans	51	3	38	92	0.554348	0.0326087	0.413043	23	post
6	Aut	D. simulans	27	19	45	91	0.296703	0.208791	0.494505	23	post
7	Aut	D. simulans	28	22	41	91	0.307692	0.241758	0.450549	23	post
8	Aut	D. simulans	36	19	38	93	0.387097	0.204301	0.408602	23	post

## Sheet: D. melanogaster mtDNAs
Cage	Nuclear Genotype	mtDNA species-type	OreR	Zm53	Number of individuals successfully genotyped	Generation_NEW	pre/post-perturbation
9	OreR	D. melanogaster	37	54	91	0	pre
10	OreR	D. melanogaster	35	56	91	0	pre
11	OreR	D. melanogaster	35	50	85	0	pre
12	OreR	D. melanogaster	37	44	81	0	pre
13	Aut	D. melanogaster	36	55	91	0	pre
14	Aut	D. melanogaster	44	46	90	0	pre
15	Aut	D. melanogaster	44	46	90	0	pre
16	Aut	D. melanogaster	52	40	92	0	pre
9	OreR	D. melanogaster	27	51	78	1	pre
10	OreR	D. melanogaster	28	63	91	1	pre
11	OreR	D. melanogaster	23	54	77	1	pre
12	OreR	D. melanogaster	11	45	56	1	pre
13	Aut	D. melanogaster	40	51	91	1	pre
14	Aut	D. melanogaster	25	27	52	1	pre
15	Aut	D. melanogaster	44	38	82	1	pre
16	Aut	D. melanogaster	23	24	47	1	pre
9	OreR	D. melanogaster	10	74	84	3	pre
10	OreR	D. melanogaster	17	59	76	3	pre
11	OreR	D. melanogaster	20	69	89	3	pre
12	OreR	D. melanogaster	17	72	89	3	pre
13	Aut	D. melanogaster	32	60	92	3	pre
14	Aut	D. melanogaster	38	49	87	3	pre
15	Aut	D. melanogaster	48	44	92	3	pre
16	Aut	D. melanogaster	33	58	91	3	pre
9	OreR	D. melanogaster	14	66	80	5	pre
10	OreR	D. melanogaster	18	62	80	5	pre
11	OreR	D. melanogaster	20	73	93	5	pre
12	OreR	D. melanogaster	19	60	79	5	pre
13	Aut	D. melanogaster	19	73	92	5	pre
14	Aut	D. melanogaster	46	45	91	5	pre
15	Aut	D. melanogaster	41	46	87	5	pre
16	Aut	D. melanogaster	36	56	92	5	pre
9	OreR	D. melanogaster	16	63	79	7	pre
10	OreR	D. melanogaster	30	59	89	7	pre
11	OreR	D. melanogaster	14	57	71	7	pre
12	OreR	D. melanogaster	17	68	85	7	pre
13	Aut	D. melanogaster	27	61	88	7	pre
14	Aut	D. melanogaster	40	35	75	7	pre
15	Aut	D. melanogaster	41	49	90	7	pre
16	Aut	D. melanogaster	26	58	84	7	pre
9	OreR	D. melanogaster	12	80	92	9	pre
10	OreR	D. melanogaster	21	63	84	9	pre
11	OreR	D. melanogaster	23	68	91	9	pre
12	OreR	D. melanogaster	25	67	92	9	pre
13	Aut	D. melanogaster	27	65	92	9	pre
14	Aut	D. melanogaster	56	36	92	9	pre
15	Aut	D. melanogaster	33	43	76	9	pre
16	Aut	D. melanogaster	24	60	84	9	pre
9	OreR	D. melanogaster	33	57	90	10	post
10	OreR	D. melanogaster	49	43	92	10	post
11	OreR	D. melanogaster	32	57	89	10	post
12	OreR	D. melanogaster	44	47	91	10	post
13	Aut	D. melanogaster	35	57	92	10	post
14	Aut	D. melanogaster	53	39	92	10	post
15	Aut	D. melanogaster	54	37	91	10	post
16	Aut	D. melanogaster	41	52	93	10	post
9	OreR	D. melanogaster	10	63	73	16	post
10	OreR	D. melanogaster	50	34	84	16	post
11	OreR	D. melanogaster	17	68	85	16	post
12	OreR	D. melanogaster	54	32	86	16	post
13	Aut	D. melanogaster	28	52	80	16	post
14	Aut	D. melanogaster	14	22	36	16	post
15	Aut	D. melanogaster	59	27	86	16	post
16	Aut	D. melanogaster	30	56	86	16	post
9	OreR	D. melanogaster	18	74	92	23	post
10	OreR	D. melanogaster	48	34	82	23	post
11	OreR	D. melanogaster	36	55	91	23	post
12	OreR	D. melanogaster	60	30	90	23	post
13	Aut	D. melanogaster	15	41	56	23	post
14	Aut	D. melanogaster	19	38	57	23	post
15	Aut	D. melanogaster	57	24	81	23	post
16	Aut	D. melanogaster	48	43	91	23	post

## Sheet: Fecundity_data
Nuc	MTDNA	Number of offspring	mtDNA species
AUT	OreR	4	D. melanogaster
AUT	OreR	7	D. melanogaster
AUT	OreR	14	D. melanogaster
AUT	OreR	20	D. melanogaster
AUT	OreR	22	D. melanogaster
AUT	OreR	23	D. melanogaster
AUT	OreR	28	D. melanogaster
AUT	OreR	30	D. melanogaster
AUT	OreR	33	D. melanogaster
AUT	OreR	36	D. melanogaster
AUT	OreR	37	D. melanogaster
AUT	OreR	39	D. melanogaster
AUT	OreR	43	D. melanogaster
AUT	OreR	44	D. melanogaster
AUT	OreR	45	D. melanogaster
AUT	OreR	46	D. melanogaster
AUT	OreR	50	D. melanogaster
AUT	OreR	52	D. melanogaster
AUT	OreR	53	D. melanogaster
AUT	OreR	53	D. melanogaster
AUT	OreR	53	D. melanogaster
AUT	OreR	54	D. melanogaster
AUT	OreR	55	D. melanogaster
AUT	OreR	55	D. melanogaster
AUT	OreR	56	D. melanogaster
AUT	OreR	56	D. melanogaster
AUT	OreR	58	D. melanogaster
AUT	OreR	59	D. melanogaster
AUT	OreR	60	D. melanogaster
AUT	OreR	61	D. melanogaster
AUT	OreR	66	D. melanogaster
AUT	OreR	66	D. melanogaster
AUT	OreR	66	D. melanogaster
AUT	OreR	68	D. melanogaster
AUT	OreR	68	D. melanogaster
AUT	OreR	68	D. melanogaster
AUT	OreR	68	D. melanogaster
AUT	OreR	68	D. melanogaster
AUT	OreR	71	D. melanogaster
AUT	OreR	71	D. melanogaster
AUT	OreR	72	D. melanogaster
AUT	OreR	72	D. melanogaster
AUT	OreR	72	D. melanogaster
AUT	OreR	72	D. melanogaster
AUT	OreR	72	D. melanogaster
AUT	OreR	75	D. melanogaster
AUT	OreR	75	D. melanogaster
AUT	OreR	76	D. melanogaster
AUT	OreR	77	D. melanogaster
AUT	OreR	78	D. melanogaster
AUT	OreR	79	D. melanogaster
AUT	OreR	80	D. melanogaster
AUT	OreR	83	D. melanogaster
AUT	OreR	88	D. melanogaster
AUT	OreR	88	D. melanogaster
AUT	OreR	89	D. melanogaster
AUT	Zm53	5	D. melanogaster
AUT	Zm53	12	D. melanogaster
AUT	Zm53	15	D. melanogaster
AUT	Zm53	25	D. melanogaster
AUT	Zm53	32	D. melanogaster
AUT	Zm53	37	D. melanogaster
AUT	Zm53	40	D. melanogaster
AUT	Zm53	41	D. melanogaster
AUT	Zm53	43	D. melanogaster
AUT	Zm53	46	D. melanogaster
AUT	Zm53	46	D. melanogaster
AUT	Zm53	53	D. melanogaster
AUT	Zm53	53	D. melanogaster
AUT	Zm53	53	D. melanogaster
AUT	Zm53	55	D. melanogaster
AUT	Zm53	55	D. melanogaster
AUT	Zm53	58	D. melanogaster
AUT	Zm53	59	D. melanogaster
AUT	Zm53	60	D. melanogaster
AUT	Zm53	60	D. melanogaster
AUT	Zm53	61	D. melanogaster
AUT	Zm53	61	D. melanogaster
AUT	Zm53	62	D. melanogaster
AUT	Zm53	63	D. melanogaster
AUT	Zm53	63	D. melanogaster
AUT	Zm53	64	D. melanogaster
AUT	Zm53	65	D. melanogaster
AUT	Zm53	66	D. melanogaster
AUT	Zm53	67	D. melanogaster
AUT	Zm53	67	D. melanogaster
AUT	Zm53	67	D. melanogaster
AUT	Zm53	67	D. melanogaster
AUT	Zm53	68	D. melanogaster
AUT	Zm53	68	D. melanogaster
AUT	Zm53	69	D. melanogaster
AUT	Zm53	70	D. melanogaster
AUT	Zm53	71	D. melanogaster
AUT	Zm53	71	D. melanogaster
AUT	Zm53	71	D. melanogaster
AUT	Zm53	72	D. melanogaster
AUT	Zm53	72	D. melanogaster
AUT	Zm53	72	D. melanogaster
AUT	Zm53	73	D. melanogaster
AUT	Zm53	73	D. melanogaster
AUT	Zm53	73	D. melanogaster
AUT	Zm53	73	D. melanogaster
AUT	Zm53	76	D. melanogaster
AUT	Zm53	79	D. melanogaster
AUT	Zm53	80	D. melanogaster
AUT	Zm53	81	D. melanogaster
AUT	Zm53	81	D. melanogaster
AUT	Zm53	83	D. melanogaster
AUT	Zm53	83	D. melanogaster
AUT	Zm53	86	D. melanogaster
AUT	Zm53	88	D. melanogaster
AUT	mau12	8	D. simulans
AUT	mau12	17	D. simulans
AUT	mau12	23	D. simulans
AUT	mau12	25	D. simulans
AUT	mau12	42	D. simulans
AUT	mau12	44	D. simulans
AUT	mau12	46	D. simulans
AUT	mau12	47	D. simulans
AUT	mau12	50	D. simulans
AUT	mau12	51	D. simulans
AUT	mau12	53	D. simulans
AUT	mau12	55	D. simulans
AUT	mau12	56	D. simulans
AUT	mau12	59	D. simulans
AUT	mau12	59	D. simulans
AUT	mau12	61	D. simulans
AUT	mau12	61	D. simulans
AUT	mau12	61	D. simulans
AUT	mau12	63	D. simulans
AUT	mau12	63	D. simulans
AUT	mau12	68	D. simulans
AUT	mau12	69	D. simulans
AUT	mau12	69	D. simulans
AUT	mau12	70	D. simulans
AUT	mau12	72	D. simulans
AUT	mau12	73	D. simulans
AUT	mau12	73	D. simulans
AUT	mau12	74	D. simulans
AUT	mau12	75	D. simulans
AUT	mau12	77	D. simulans
AUT	mau12	77	D. simulans
AUT	mau12	77	D. simulans
AUT	mau12	79	D. simulans
AUT	mau12	81	D. simulans
AUT	mau12	81	D. simulans
AUT	mau12	82	D. simulans
AUT	mau12	82	D. simulans
AUT	mau12	84	D. simulans
AUT	mau12	86	D. simulans
AUT	mau12	86	D. simulans
AUT	mau12	89	D. simulans
AUT	mau12	89	D. simulans
AUT	mau12	90	D. simulans
AUT	mau12	90	D. simulans
AUT	mau12	91	D. simulans
AUT	mau12	91	D. simulans
AUT	mau12	96	D. simulans
AUT	mau12	96	D. simulans
AUT	mau12	96	D. simulans
AUT	mau12	98	D. simulans
AUT	mau12	98	D. simulans
AUT	mau12	99	D. simulans
AUT	mau12	99	D. simulans
AUT	mau12	110	D. simulans
AUT	mau12	112	D. simulans
AUT	mau12	113	D. simulans
AUT	mau12	113	D. simulans
AUT	mau12	120	D. simulans
AUT	mau12	122	D. simulans
AUT	siI	8	D. simulans
AUT	siI	13	D. simulans
AUT	siI	23	D. simulans
AUT	siI	30	D. simulans
AUT	siI	32	D. simulans
AUT	siI	39	D. simulans
AUT	siI	43	D. simulans
AUT	siI	45	D. simulans
AUT	siI	47	D. simulans
AUT	siI	51	D. simulans
AUT	siI	59	D. simulans
AUT	siI	59	D. simulans
AUT	siI	64	D. simulans
AUT	siI	66	D. simulans
AUT	siI	67	D. simulans
AUT	siI	68	D. simulans
AUT	siI	69	D. simulans
AUT	siI	69	D. simulans
AUT	siI	70	D. simulans
AUT	siI	70	D. simulans
AUT	siI	70	D. simulans
AUT	siI	71	D. simulans
AUT	siI	71	D. simulans
AUT	siI	71	D. simulans
AUT	siI	71	D. simulans
AUT	siI	72	D. simulans
AUT	siI	73	D. simulans
AUT	siI	73	D. simulans
AUT	siI	79	D. simulans
AUT	siI	79	D. simulans
AUT	siI	79	D. simulans
AUT	siI	79	D. simulans
AUT	siI	87	D. simulans
AUT	siI	90	D. simulans
AUT	siI	91	D. simulans
AUT	siI	93	D. simulans
AUT	siI	95	D. simulans
AUT	siI	96	D. simulans
AUT	siI	97	D. simulans
AUT	siI	97	D. simulans
AUT	siI	100	D. simulans
AUT	siI	101	D. simulans
AUT	siI	106	D. simulans
AUT	siI	126	D. simulans
AUT	sm21	4	D. simulans
AUT	sm21	9	D. simulans
AUT	sm21	12	D. simulans
AUT	sm21	15	D. simulans
AUT	sm21	22	D. simulans
AUT	sm21	31	D. simulans
AUT	sm21	33	D. simulans
AUT	sm21	39	D. simulans
AUT	sm21	42	D. simulans
AUT	sm21	46	D. simulans
AUT	sm21	47	D. simulans
AUT	sm21	47	D. simulans
AUT	sm21	49	D. simulans
AUT	sm21	50	D. simulans
AUT	sm21	52	D. simulans
AUT	sm21	52	D. simulans
AUT	sm21	53	D. simulans
AUT	sm21	54	D. simulans
AUT	sm21	56	D. simulans
AUT	sm21	56	D. simulans
AUT	sm21	58	D. simulans
AUT	sm21	59	D. simulans
AUT	sm21	60	D. simulans
AUT	sm21	61	D. simulans
AUT	sm21	62	D. simulans
AUT	sm21	63	D. simulans
AUT	sm21	64	D. simulans
AUT	sm21	65	D. simulans
AUT	sm21	65	D. simulans
AUT	sm21	66	D. simulans
AUT	sm21	69	D. simulans
AUT	sm21	71	D. simulans
AUT	sm21	71	D. simulans
AUT	sm21	72	D. simulans
AUT	sm21	74	D. simulans
AUT	sm21	75	D. simulans
AUT	sm21	75	D. simulans
AUT	sm21	75	D. simulans
AUT	sm21	76	D. simulans
AUT	sm21	76	D. simulans
AUT	sm21	76	D. simulans
AUT	sm21	76	D. simulans
AUT	sm21	76	D. simulans
AUT	sm21	76	D. simulans
AUT	sm21	76	D. simulans
AUT	sm21	77	D. simulans
AUT	sm21	77	D. simulans
AUT	sm21	79	D. simulans
AUT	sm21	80	D. simulans
AUT	sm21	80	D. simulans
AUT	sm21	81	D. simulans
AUT	sm21	81	D. simulans
AUT	sm21	81	D. simulans
AUT	sm21	82	D. simulans
AUT	sm21	83	D. simulans
AUT	sm21	83	D. simulans
AUT	sm21	84	D. simulans
AUT	sm21	85	D. simulans
AUT	sm21	87	D. simulans
AUT	sm21	89	D. simulans
AUT	sm21	90	D. simulans
AUT	sm21	92	D. simulans
AUT	sm21	92	D. simulans
AUT	sm21	95	D. simulans
AUT	sm21	98	D. simulans
AUT	sm21	99	D. simulans
AUT	sm21	100	D. simulans
AUT	sm21	100	D. simulans
AUT	sm21	101	D. simulans
AUT	sm21	106	D. simulans
AUT	sm21	108	D. simulans
AUT	sm21	110	D. simulans
AUT	sm21	116	D. simulans
AUT	sm21	116	D. simulans
AUT	sm21	118	D. simulans
OreR	OreR	5	D. melanogaster
OreR	OreR	6	D. melanogaster
OreR	OreR	7	D. melanogaster
OreR	OreR	7	D. melanogaster
OreR	OreR	10	D. melanogaster
OreR	OreR	12	D. melanogaster
OreR	OreR	12	D. melanogaster
OreR	OreR	14	D. melanogaster
OreR	OreR	17	D. melanogaster
OreR	OreR	18	D. melanogaster
OreR	OreR	18	D. melanogaster
OreR	OreR	24	D. melanogaster
OreR	OreR	25	D. melanogaster
OreR	OreR	29	D. melanogaster
OreR	OreR	29	D. melanogaster
OreR	OreR	30	D. melanogaster
OreR	OreR	32	D. melanogaster
OreR	OreR	33	D. melanogaster
OreR	OreR	38	D. melanogaster
OreR	OreR	39	D. melanogaster
OreR	OreR	42	D. melanogaster
OreR	OreR	43	D. melanogaster
OreR	OreR	48	D. melanogaster
OreR	OreR	54	D. melanogaster
OreR	OreR	55	D. melanogaster
OreR	OreR	56	D. melanogaster
OreR	OreR	60	D. melanogaster
OreR	OreR	62	D. melanogaster
OreR	OreR	66	D. melanogaster
OreR	OreR	66	D. melanogaster
OreR	OreR	68	D. melanogaster
OreR	OreR	70	D. melanogaster
OreR	OreR	71	D. melanogaster
OreR	OreR	81	D. melanogaster
OreR	OreR	82	D. melanogaster
OreR	OreR	87	D. melanogaster
OreR	OreR	97	D. melanogaster
OreR	OreR	97	D. melanogaster
OreR	OreR	97	D. melanogaster
OreR	OreR	102	D. melanogaster
OreR	OreR	105	D. melanogaster
OreR	OreR	105	D. melanogaster
OreR	OreR	112	D. melanogaster
OreR	Zm53	5	D. melanogaster
OreR	Zm53	5	D. melanogaster
OreR	Zm53	7	D. melanogaster
OreR	Zm53	11	D. melanogaster
OreR	Zm53	12	D. melanogaster
OreR	Zm53	13	D. melanogaster
OreR	Zm53	14	D. melanogaster
OreR	Zm53	18	D. melanogaster
OreR	Zm53	19	D. melanogaster
OreR	Zm53	19	D. melanogaster
OreR	Zm53	22	D. melanogaster
OreR	Zm53	22	D. melanogaster
OreR	Zm53	24	D. melanogaster
OreR	Zm53	28	D. melanogaster
OreR	Zm53	30	D. melanogaster
OreR	Zm53	30	D. melanogaster
OreR	Zm53	30	D. melanogaster
OreR	Zm53	34	D. melanogaster
OreR	Zm53	35	D. melanogaster
OreR	Zm53	39	D. melanogaster
OreR	Zm53	45	D. melanogaster
OreR	Zm53	46	D. melanogaster
OreR	Zm53	53	D. melanogaster
OreR	Zm53	55	D. melanogaster
OreR	Zm53	55	D. melanogaster
OreR	Zm53	56	D. melanogaster
OreR	Zm53	59	D. melanogaster
OreR	Zm53	60	D. melanogaster
OreR	Zm53	61	D. melanogaster
OreR	Zm53	62	D. melanogaster
OreR	Zm53	64	D. melanogaster
OreR	Zm53	65	D. melanogaster
OreR	Zm53	65	D. melanogaster
OreR	Zm53	66	D. melanogaster
OreR	Zm53	66	D. melanogaster
OreR	Zm53	68	D. melanogaster
OreR	Zm53	72	D. melanogaster
OreR	Zm53	72	D. melanogaster
OreR	Zm53	74	D. melanogaster
OreR	Zm53	74	D. melanogaster
OreR	Zm53	74	D. melanogaster
OreR	Zm53	77	D. melanogaster
OreR	Zm53	79	D. melanogaster
OreR	Zm53	82	D. melanogaster
OreR	Zm53	85	D. melanogaster
OreR	Zm53	86	D. melanogaster
OreR	Zm53	90	D. melanogaster
OreR	Zm53	93	D. melanogaster
OreR	Zm53	93	D. melanogaster
OreR	Zm53	93	D. melanogaster
OreR	Zm53	93	D. melanogaster
OreR	Zm53	94	D. melanogaster
OreR	Zm53	96	D. melanogaster
OreR	Zm53	98	D. melanogaster
OreR	Zm53	100	D. melanogaster
OreR	Zm53	101	D. melanogaster
OreR	Zm53	102	D. melanogaster
OreR	Zm53	102	D. melanogaster
OreR	Zm53	105	D. melanogaster
OreR	Zm53	105	D. melanogaster
OreR	Zm53	106	D. melanogaster
OreR	Zm53	109	D. melanogaster
OreR	Zm53	110	D. melanogaster
OreR	Zm53	113	D. melanogaster
OreR	Zm53	116	D. melanogaster
OreR	Zm53	117	D. melanogaster
OreR	Zm53	118	D. melanogaster
OreR	Zm53	118	D. melanogaster
OreR	Zm53	120	D. melanogaster
OreR	Zm53	137	D. melanogaster
OreR	mau12	1	D. simulans
OreR	mau12	4	D. simulans
OreR	mau12	4	D. simulans
OreR	mau12	5	D. simulans
OreR	mau12	7	D. simulans
OreR	mau12	8	D. simulans
OreR	mau12	11	D. simulans
OreR	mau12	11	D. simulans
OreR	mau12	12	D. simulans
OreR	mau12	13	D. simulans
OreR	mau12	15	D. simulans
OreR	mau12	15	D. simulans
OreR	mau12	16	D. simulans
OreR	mau12	18	D. simulans
OreR	mau12	20	D. simulans
OreR	mau12	20	D. simulans
OreR	mau12	22	D. simulans
OreR	mau12	25	D. simulans
OreR	mau12	30	D. simulans
OreR	mau12	31	D. simulans
OreR	mau12	34	D. simulans
OreR	mau12	34	D. simulans
OreR	mau12	34	D. simulans
OreR	mau12	35	D. simulans
OreR	mau12	36	D. simulans
OreR	mau12	40	D. simulans
OreR	mau12	40	D. simulans
OreR	mau12	42	D. simulans
OreR	mau12	45	D. simulans
OreR	mau12	46	D. simulans
OreR	mau12	46	D. simulans
OreR	mau12	46	D. simulans
OreR	mau12	46	D. simulans
OreR	mau12	47	D. simulans
OreR	mau12	48	D. simulans
OreR	mau12	49	D. simulans
OreR	mau12	52	D. simulans
OreR	mau12	52	D. simulans
OreR	mau12	52	D. simulans
OreR	mau12	52	D. simulans
OreR	mau12	54	D. simulans
OreR	mau12	54	D. simulans
OreR	mau12	58	D. simulans
OreR	mau12	62	D. simulans
OreR	mau12	65	D. simulans
OreR	mau12	76	D. simulans
OreR	mau12	78	D. simulans
OreR	mau12	80	D. simulans
OreR	mau12	83	D. simulans
OreR	mau12	85	D. simulans
OreR	siI	1	D. simulans
OreR	siI	1	D. simulans
OreR	siI	2	D. simulans
OreR	siI	2	D. simulans
OreR	siI	4	D. simulans
OreR	siI	5	D. simulans
OreR	siI	5	D. simulans
OreR	siI	5	D. simulans
OreR	siI	5	D. simulans
OreR	siI	6	D. simulans
OreR	siI	7	D. simulans
OreR	siI	7	D. simulans
OreR	siI	8	D. simulans
OreR	siI	8	D. simulans
OreR	siI	9	D. simulans
OreR	siI	9	D. simulans
OreR	siI	10	D. simulans
OreR	siI	11	D. simulans
OreR	siI	12	D. simulans
OreR	siI	12	D. simulans
OreR	siI	12	D. simulans
OreR	siI	17	D. simulans
OreR	siI	18	D. simulans
OreR	siI	19	D. simulans
OreR	siI	19	D. simulans
OreR	siI	19	D. simulans
OreR	siI	20	D. simulans
OreR	siI	21	D. simulans
OreR	siI	21	D. simulans
OreR	siI	22	D. simulans
OreR	siI	22	D. simulans
OreR	siI	23	D. simulans
OreR	siI	23	D. simulans
OreR	siI	23	D. simulans
OreR	siI	23	D. simulans
OreR	siI	23	D. simulans
OreR	siI	26	D. simulans
OreR	siI	27	D. simulans
OreR	siI	28	D. simulans
OreR	siI	28	D. simulans
OreR	siI	28	D. simulans
OreR	siI	31	D. simulans
OreR	siI	31	D. simulans
OreR	siI	33	D. simulans
OreR	siI	33	D. simulans
OreR	siI	34	D. simulans
OreR	siI	34	D. simulans
OreR	siI	34	D. simulans
OreR	siI	35	D. simulans
OreR	siI	35	D. simulans
OreR	siI	37	D. simulans
OreR	siI	38	D. simulans
OreR	siI	39	D. simulans
OreR	siI	41	D. simulans
OreR	siI	41	D. simulans
OreR	siI	41	D. simulans
OreR	siI	41	D. simulans
OreR	siI	42	D. simulans
OreR	siI	42	D. simulans
OreR	siI	42	D. simulans
OreR	siI	44	D. simulans
OreR	siI	44	D. simulans
OreR	siI	44	D. simulans
OreR	siI	47	D. simulans
OreR	siI	49	D. simulans
OreR	siI	50	D. simulans
OreR	siI	51	D. simulans
OreR	siI	51	D. simulans
OreR	siI	52	D. simulans
OreR	siI	52	D. simulans
OreR	siI	53	D. simulans
OreR	siI	54	D. simulans
OreR	siI	55	D. simulans
OreR	siI	58	D. simulans
OreR	siI	58	D. simulans
OreR	siI	60	D. simulans
OreR	siI	60	D. simulans
OreR	siI	62	D. simulans
OreR	siI	62	D. simulans
OreR	siI	65	D. simulans
OreR	siI	66	D. simulans
OreR	siI	67	D. simulans
OreR	siI	67	D. simulans
OreR	siI	67	D. simulans
OreR	siI	68	D. simulans
OreR	siI	71	D. simulans
OreR	siI	74	D. simulans
OreR	siI	77	D. simulans
OreR	siI	78	D. simulans
OreR	siI	79	D. simulans
OreR	siI	82	D. simulans
OreR	siI	83	D. simulans
OreR	siI	84	D. simulans
OreR	siI	87	D. simulans
OreR	siI	88	D. simulans
OreR	siI	89	D. simulans
OreR	sm21	8	D. simulans
OreR	sm21	10	D. simulans
OreR	sm21	12	D. simulans
OreR	sm21	14	D. simulans
OreR	sm21	16	D. simulans
OreR	sm21	19	D. simulans
OreR	sm21	19	D. simulans
OreR	sm21	21	D. simulans
OreR	sm21	23	D. simulans
OreR	sm21	25	D. simulans
OreR	sm21	28	D. simulans
OreR	sm21	29	D. simulans
OreR	sm21	30	D. simulans
OreR	sm21	33	D. simulans
OreR	sm21	33	D. simulans
OreR	sm21	33	D. simulans
OreR	sm21	37	D. simulans
OreR	sm21	37	D. simulans
OreR	sm21	39	D. simulans
OreR	sm21	40	D. simulans
OreR	sm21	40	D. simulans
OreR	sm21	41	D. simulans
OreR	sm21	47	D. simulans
OreR	sm21	49	D. simulans
OreR	sm21	56	D. simulans
OreR	sm21	64	D. simulans
OreR	sm21	65	D. simulans
OreR	sm21	69	D. simulans
